# Supplementary material for: A new on-surface synthetic pathway to 5-armchair graphene nanoribbons on Cu(111) surfaces
Source: Royal Society of Chemistry journal article supplement (doi:10.1039/c7fd00129k), 2017-01-01
Supplement: c7fd00129k1.pdf [file c7fd00129k1.pdf]

## Supplementary Information

### A new On-Surface-Synthetic Pathway to 5-Armchair Graphene

#### Nanoribbons on Cu (111) surfaces

Kewei Sun<sup>1</sup>, Penghui Ji<sup>1</sup>, Haiming Zhang<sup>1,\*</sup>, Kaifeng Niu<sup>1</sup>, Ling Li<sup>1</sup>, Aixi Chen<sup>1</sup>, Qing Li<sup>1</sup>, Klaus Müllen<sup>2,\*</sup> and Lifeng Chi<sup>1,\*</sup>

<sup>1</sup>Institute of Functional Nano and Soft Materials (FUNSOM), Jiangsu Key Laboratory for Carbon-Based Functional Materials & devices, Soochow University, Suzhou 215123, P. R. China

<sup>2</sup>Institute of Physical Chemistry, Johannes Gutenberg University Mainz, Duesbergweg 10-14, D-55128 Mainz

#### Corresponding Author

\*Email: [hmzhang@suda.edu.cn](mailto:hmzhang@suda.edu.cn), [muellen@mpip-mainz.mpg.de](mailto:muellen@mpip-mainz.mpg.de), [chilf@suda.edu.cn](mailto:chilf@suda.edu.cn)

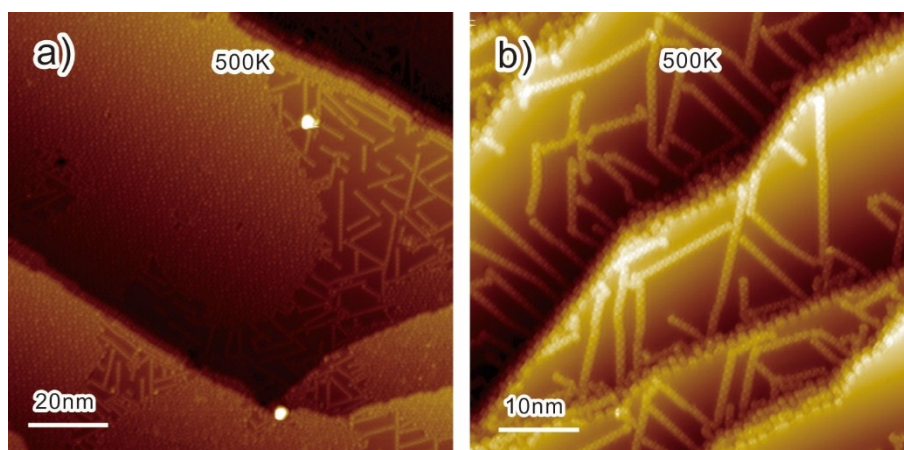

Figure S1. STM images of the sample prepared by depositing PTCDA on Cu(111) held at 500K, showing the coexistence of self-assembled PTCDA and copper-perylene chains.

Scanning tunneling spectroscopy measurements have been performed to explore the electronic property of the newly formed patches [1,2]. Figure S2, panel a, displays the STM image of some patches on the Cu (111) surface. Three asterisks (black, red, blue) mark the location where STS curves have been collected. Figure S1 panel b shows the

STS spectra obtained on top of the Cu (111) (black curve), bright patch (red) and dark patch (blue), respectively. The prominent features at 0.75V in  $dI/dV$  spectra of bright and dark patches is consistent with the spectrum of  $\text{Cu}_2\text{O}$  [2-4].

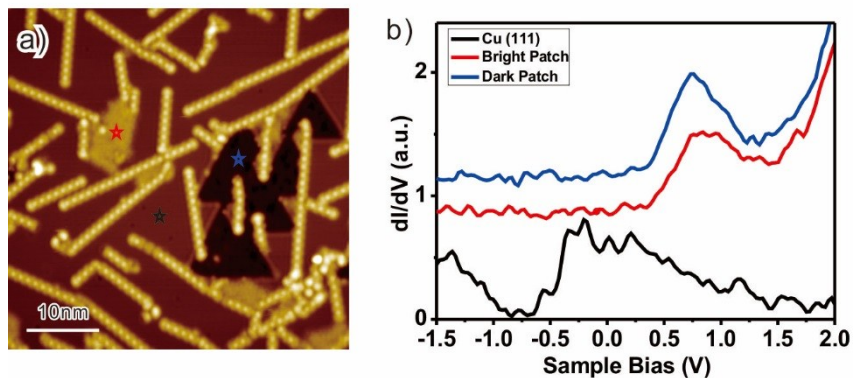

Figure S2 (a) STM image of the copper-terphenyl chains on Cu (111) with remarkable patches after exposure to oxygen (pressure:  $2\sim 3\times 10^{-8}$  mbar) for thermal annealing at 370K ( $V_b = 1\text{V}$ ,  $I_t = 100\text{pA}$ ), (b)  $dI/dV$  spectra obtained on a bare Cu (111) surface (black), the bright patch (red) and the dark patch (blue).

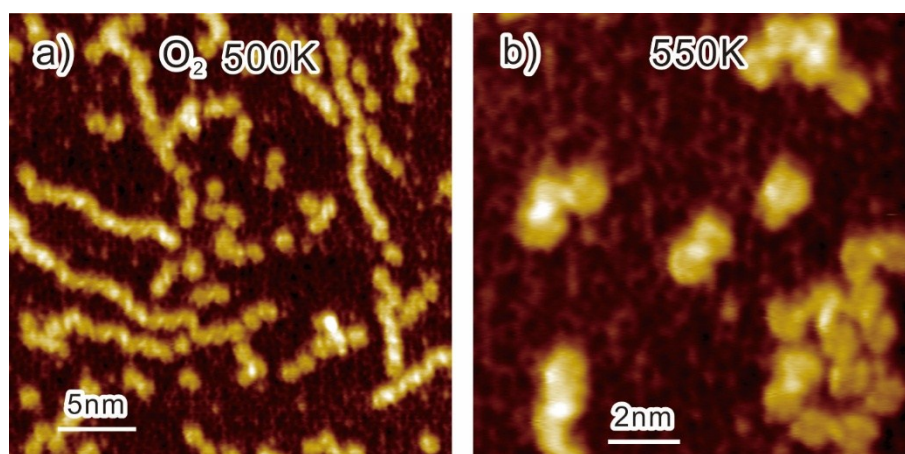

Figure S3 STM images of the sample annealed at 500K (a) and 550K (b) with the exposure of oxygen. Besides the copper-terphenyl chains, the segments of the chains are recognizable in STM images, showing the breaking of aryl-Cu bonds.

## References

1. A. Gharachorlou, M. D. Detwiler, X. K. Gu, L. Mayr, B. Klötzer, J. Greeley, R. G. Reifenberger, W. N. Delgass, F. H. Ribeiro and D. Y. Zemlyanov, *ACS Appl.*

*Mater. Interfaces*, 2015, **7**, 16428-16439.

2. C. X. Kronawitter, C. Riplinger, X. B. He, P. Zahl, E. A. Carter, P. Sutter and B. E. Koel, *J. Am. Chem. Soc.*, 2014, **136**, 13283–13288.
3. N. Nilius, H. Fedderwitz, B. Groß, C. Noguera and J. Goniakowski, *Phys. Chem. Chem. Phys.*, 2016, **18**, 6729-6733.
4. H. Sträter, H. Fedderwitz, B. Groß and N. Nilius, *J. Phys. Chem. C*, 2015, **119**, 5975-5981.
